# Supplementary material for: A facile synthesis of a novel 4-hydroxyl-3-azo coumarin based colorimetric probes for detecting Hg2+ and a fluorescence turn-off response of 3CBD to Fe3+ in aqueous environment
Source: Royal Society of Chemistry journal article supplement (doi:10.1039/d3ra04047j), 2023-01-01
Supplement: d3ra04047j1.pdf [file d3ra04047j1.pdf]

## Supporting Information

**A facile synthesis of a novel 4-hydroxyl-3-azo coumarin based colorimetric probes for detecting Hg<sup>2+</sup> and a fluorescence turn-off response of 3CBD to Fe<sup>3+</sup> in aqueous environment**

**Simeon Hamukoshi<sup>1</sup>, Neliswa Mama<sup>1\*</sup>, Stiaan Schoeman<sup>1</sup>, Veikko Uahengo<sup>2</sup>**

### Caption for Figures

|                                                                                           |   |
|-------------------------------------------------------------------------------------------|---|
| <b>Figure S 1:</b> <sup>1</sup> H NMR spectra for coumpling constant in <b>DMSO</b> ..... | 1 |
| <b>Figure S 2:</b> <sup>1</sup> H NMR spectra for <b>3CQD</b> in CDCl <sub>3</sub> .....  | 2 |
| <b>Figure S 3:</b> <sup>1</sup> H NMR spectra for <b>3CBD</b> in CDCl <sub>3</sub> .....  | 2 |
| <b>Figure S 4:</b> FT-IR spectra for <b>3CBD</b> .....                                    | 3 |
| <b>Figure S 5:</b> FT-IR spectra for <b>3CQD</b> .....                                    | 3 |

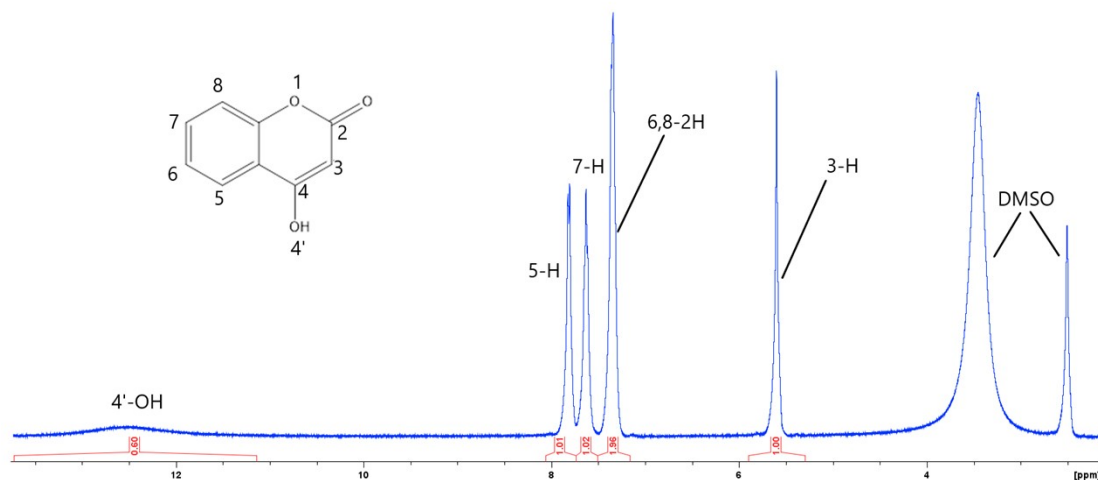

**Figure S 1:** <sup>1</sup>H NMR spectra for coumpling constant in **DMSO**.

<sup>1</sup>H NMR (CDCl<sub>3</sub>, 400 MHz) δ 7.81 (dd, *J* = 7.5, 1.5 Hz, 1H), 7.69 (td, *J* = 7.5, 1.5 Hz, 1H), 7.42 – 7.33 (m, 2H), 5.60 (s, 1H), 4.76 (s, 1H). <sup>13</sup>C NMR (CDCl<sub>3</sub>, 400 MHz) δ 164.88 , 163.59 , 153.43 , 133.66 , 124.25 , 123.97 , 118.57 , 115.68 , 90.56 .

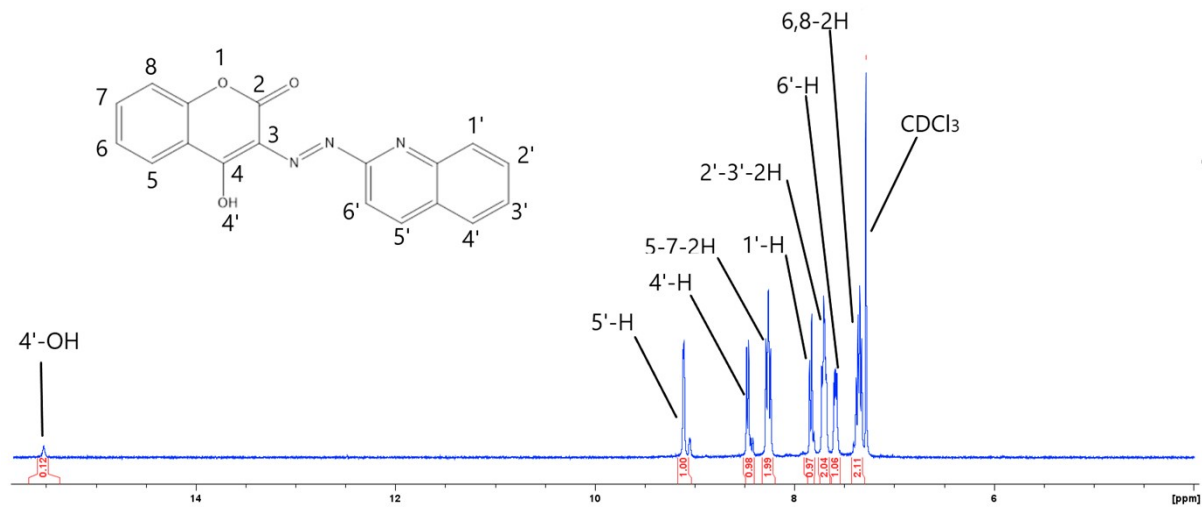

**Figure S 2:**  $^1\text{H}$  NMR spectra for 3CQD in  $\text{CDCl}_3$ .

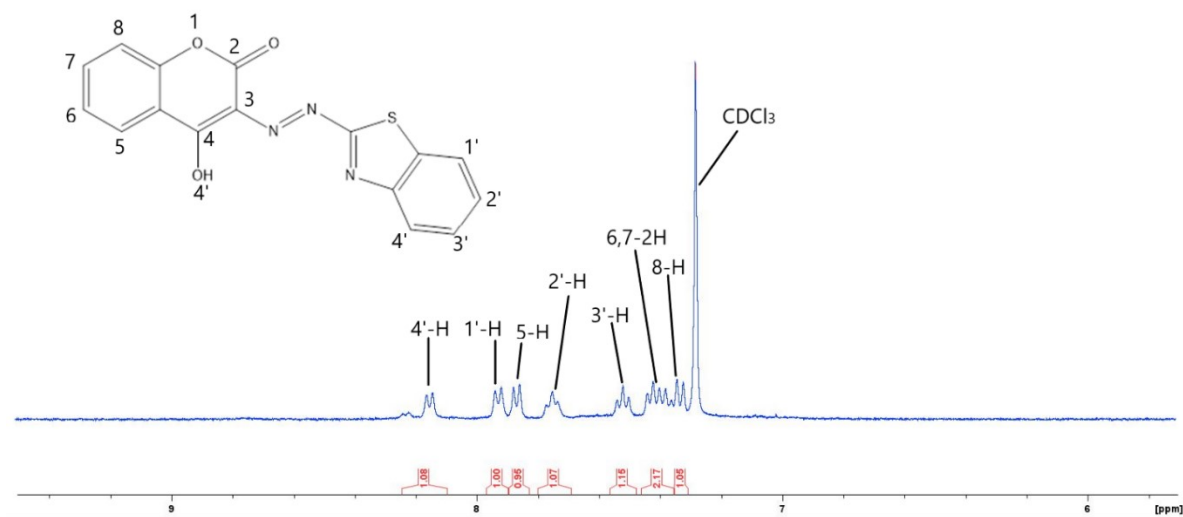

**Figure S 3:**  $^1\text{H}$  NMR spectra for 3CBD in  $\text{CDCl}_3$ .

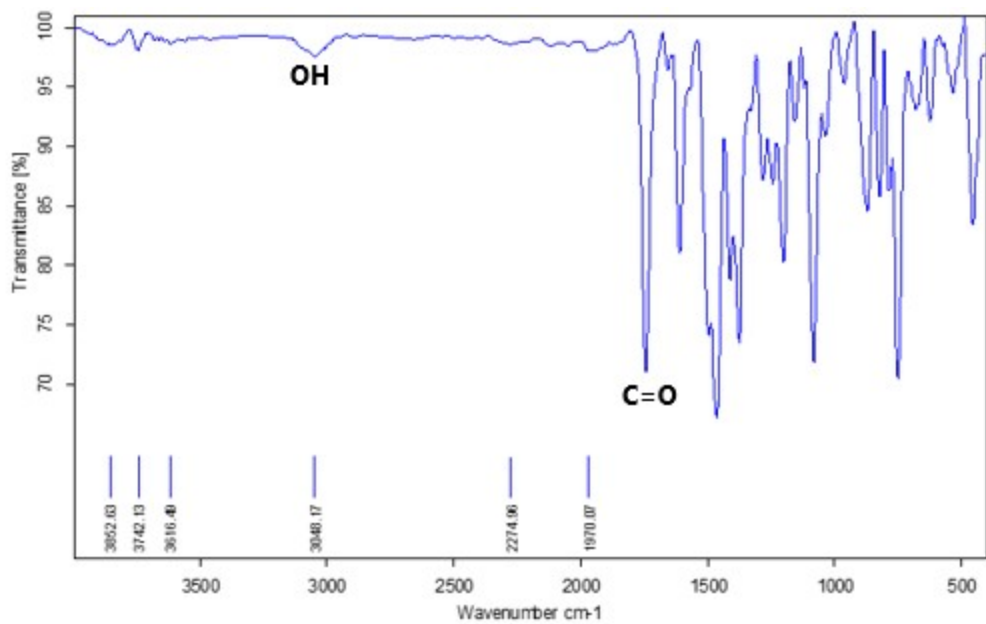

*Figure S 4: FT-IR spectra for 3CBD.*

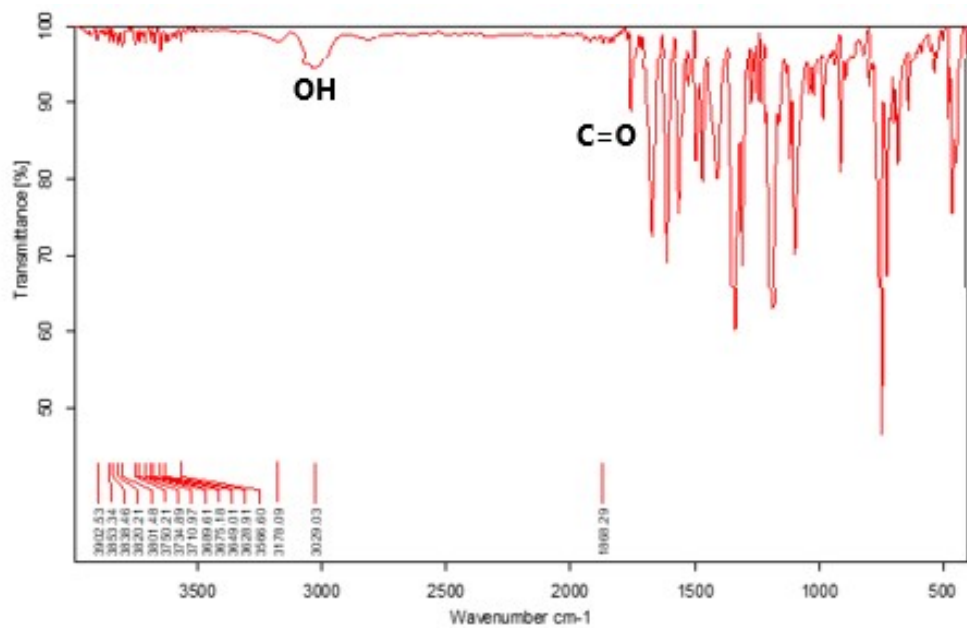

*Figure S 5: FT-IR spectra for 3CQD.*
